# Supplementary material
Source: Springer Nature journal article supplement (https://www.springermedizin.de/resource/supplementary/12885_2011_2769_MOESM8_ESM.pdf/9461902)

**A**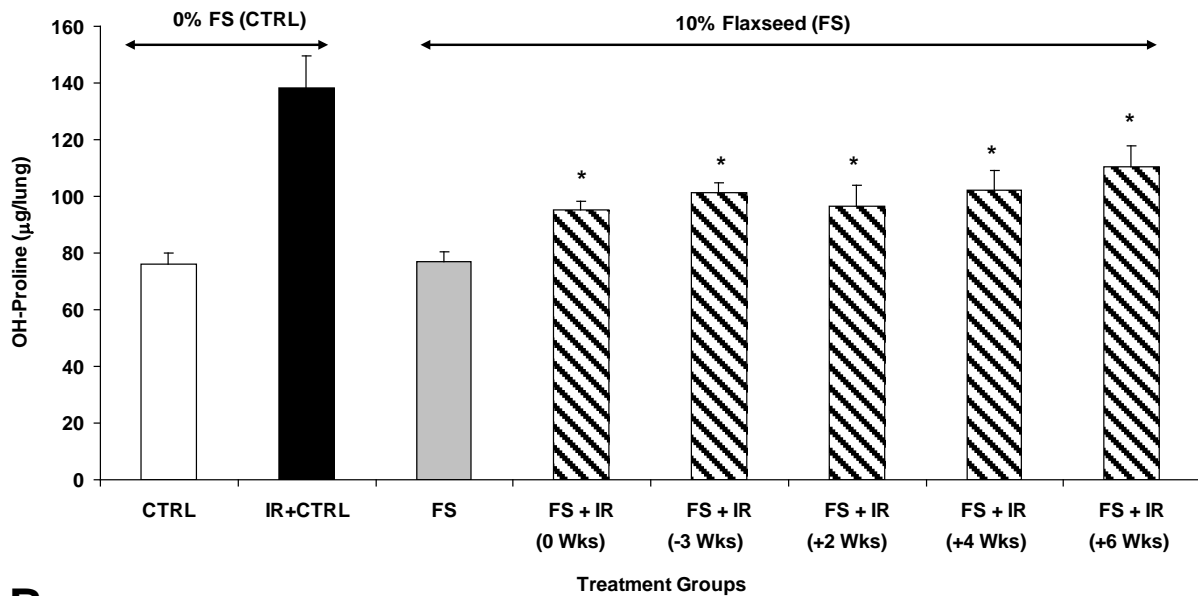**B**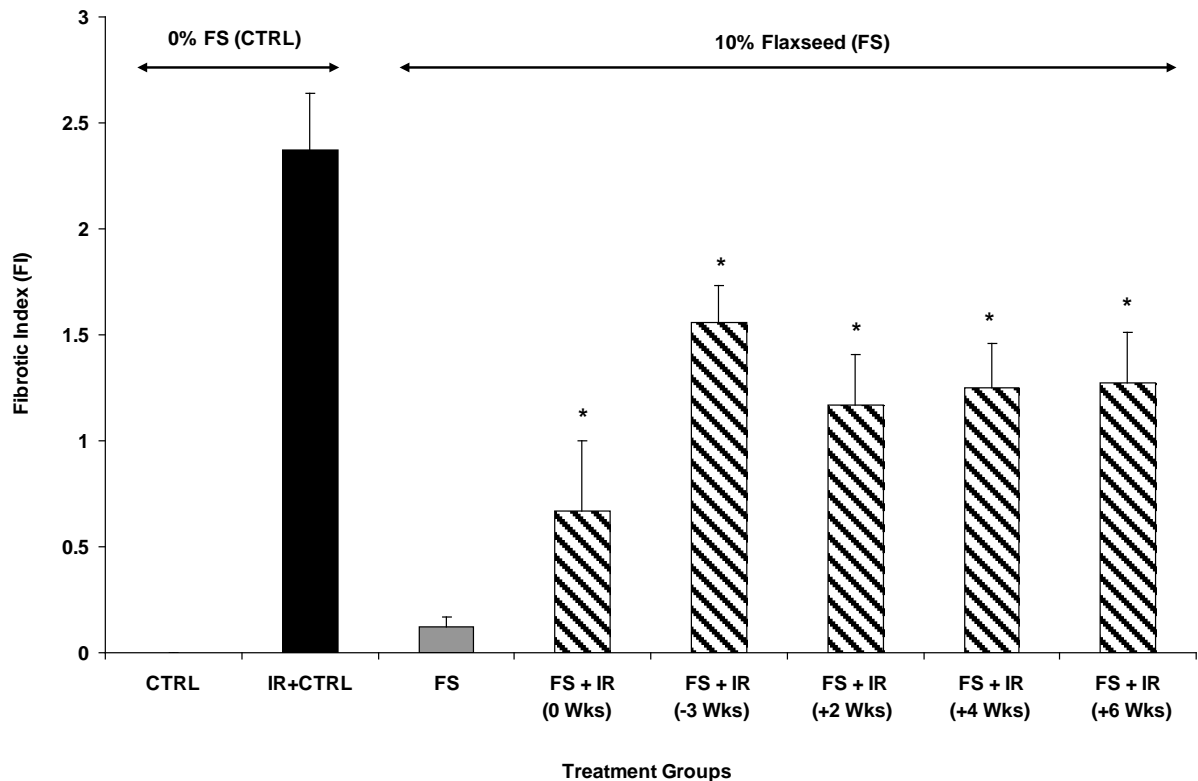

Supplement: MOESM8 [file 9461902]
